# Supplementary material for: Isolation of a Trypanosome Related to Trypanosoma theileri (Kinetoplastea: Trypanosomatidae) from Phlebotomus perfiliewi (Diptera: Psychodidae)
Source: Biomed Res Int. 2018 Jul 15;2018:2597074. doi: 10.1155/2018/2597074 (PMC6077689; doi:10.1155/2018/2597074)
Supplement: Supplementary Materials — Figure S1. The spermatheca of the Phlebotomus perfiliewi female from which the trypanosome strain (TrPhp1) was isolated; tip of the abdomen (above) and detail of the spermatheca (below). Figure S2. Cultured trypanosomes (strain named TrPhp1) stained (Hemacolor®) under optical microscope (1000×). Figure S3. Phylogenetic trees of the SSU and ITS-1 sequence alignments obtained by neighbor-joining and minimum evolution methods. Video. Video of the isolated trypanosome strain (TrPhp1) as was originally found in the sand fly hindgut. [file 2597074.f1.zip]

Archive with 2 entries (2 files):
- mat.2597074.v2.pdf
- Tryp_theileri_sandfly_Calzoalri_et_al.mp4
